# Supplementary material for: CO oxidation catalyzed by silver nanoclusters: mechanism and effects of charge
Source: Royal Society of Chemistry journal article supplement (doi:10.1039/c2cp41845b), 2012-01-01
Supplement: c2cp41845b.pdf [file c2cp41845b.pdf]

# Supporting Information

*for*

## CO Oxidation Catalyzed by Silver Nanoclusters: Mechanism and Effects of Charge

Dianyong Tang, <sup>\*a</sup> Zhongzhu Chen, <sup>b</sup> Jianping Hu, <sup>\*a</sup> Guofeng Sun, <sup>a</sup> Shenzhuang Lu<sup>a</sup> and  
Changwei Hu<sup>c</sup>

<sup>[a]</sup>Centre for Functional Molecular Design, Department of Chemistry, Leshan Normal  
College, Leshan 614000, P. R. China

<sup>[b]</sup>Department of New Drug Development, Haimen Wisdom Pharmaceutical Co., Ltd.,  
Haimen 226100, P. R. China

<sup>[c]</sup>Key Laboratory of Green Chemistry and Technology (Sichuan University), MOE,  
College of Chemistry, Sichuan University, Chengdu 610064, P. R. China

\*Corresponding Author: Tel & Fax: +86-833-2272106, qchem@189.cn or  
tangdy2008@163.com (D. Tang); Tel: +86-18981384068,  
hujianping@emails.bjut.edu.cn or lion\_hjp@yahoo.com.cn (J. Hu).

## S1. Validation of Theoretical Method

To support our choice for the combination of the functional and basis sets described in the computational details, we provide benchmark calculations of the electron affinities (EAs) and ionization potentials (IPs) for Ag, Ag<sub>2</sub>, Ag<sub>3</sub>, and O<sub>2</sub>, and of the geometrical parameters for O<sub>2</sub>, CO, and CO<sub>2</sub>. As shown in Table S1, the calculated IPs and EAs are in good agreement with the previous experimental values. The Ag-Ag bond length and bond energies of Ag<sub>2</sub> are predicted to be 2.578 Å and 1.66 eV, which are in fair agreement with experimental findings (2.480 Å and 1.69 eV).<sup>1</sup> The predicted ground state of Ag<sub>3</sub> cluster is <sup>2</sup>B<sub>2</sub> state with C<sub>2v</sub> point group, which is in line with the CCSD(T) results.<sup>2</sup> The Ag-Ag bond length of the Ag<sub>3</sub> ground state is 2.648 Å, which is close to that (2.643 Å) obtained at CCSD(T)/aVQZ level.<sup>2</sup> The experimental and computational values of the atomization energy [3\*E(Ag)-E(Ag<sub>3</sub>)] for Ag<sub>3</sub> cluster are 2.62±0.13 and 2.34 eV, respectively.<sup>3</sup> The calculated (experimental) bond lengths of C-O in CO, O-O in O<sub>2</sub>, and C-O in CO<sub>2</sub> are 1.138(1.128), 1.226(1.207), and 1.176(1.169) Å,<sup>4</sup> respectively. The calculated (experimental) bond lengths of Ag-O in AgO are 1.995(2.005) Å.<sup>5</sup> In summary, these facts indicate the acceptable accuracy and reliability of the level of theory used.

Table S1 Calculated and Experimental Electron Affinities (EAs, eV) and Ionization Potentials (IPs, eV) for Ag, Ag<sub>2</sub>, Ag<sub>3</sub>, AgO, and O<sub>2</sub>

| Species         | <i>calculated</i> |       | <i>experiment</i>     |                    |
|-----------------|-------------------|-------|-----------------------|--------------------|
|                 | EA                | IP    | EA                    | IP                 |
| Ag              | 0.17              | 7.75  | 1.302 <sup>a</sup>    | 7.576 <sup>b</sup> |
| Ag <sub>2</sub> | 0.38              | 7.67  | 1.028 <sup>c</sup>    | 7.56 <sup>d</sup>  |
| Ag <sub>3</sub> | 1.71              | 5.76  | 2.27±0.1 <sup>e</sup> | 5.65 <sup>f</sup>  |
| O <sub>2</sub>  | 0.84              | 12.76 | 0.45 <sup>g</sup>     | 12.05 <sup>h</sup> |
| AgO             | 1.06              | 9.10  | 1.654 <sup>i</sup>    | -                  |

<sup>a</sup> ref. 6 <sup>b</sup> ref. 7 <sup>c</sup> ref. 8 <sup>d</sup> ref. 9 <sup>e</sup> ref. 10 <sup>f</sup> CCSD(t)/ aVQZ level in ref. 2

<sup>g</sup> ref. 4 <sup>h</sup> ref. 11 <sup>i</sup> ref. 12

## References

1. V. Beutel, H.-G. Kramer, G. L. Bhale, M. Kuhn, K. Weyers and W. Demtröder, *J. Chem. Phys.*, 1993, **98**, 2699.
2. M.-J. Huang and J. D. Watts, *Phys. Chem. Chem. Phys.*, 2012, **14**, 6849.
3. K. Hilpert and K. A. Gingerich, *Berichte Bunsengesellschaft für Physikalische Chemie*, 1980, **84**, 739.
4. CRC Handbook of Chemistry and Physics, ed. D. R. Lide, CRC Press, Boca Raton, FL, 90th edn., 2010, p10-157.
5. L. C. O'Brien, S. J. Wall and M. K. Sieber, *J. Mol. Spectrosc.* 1997, **183**, 57.
6. H. Hotop and W. C. Lineberger, *J. Phys. Chem. Ref. Data*, 1975, **14**, 731.
7. H.-P. Looock, L. M. Beaty and B. Simard, *Phys. Rev. A*, 1999, **59**, 873.
8. K. J. Taylor, C. L. Pettiette-Hall, O. Cheshnovsky and R. E. Smalley, *J. Chem. Phys.*, 1992, **96**, 3319; H. Handschuh, C.-Y. Cha, P. S. Bechthold, G. Ganteför and W. Eberhardt, *J. Chem. Phys.*, 1995, **102**, 6406; J. Ho, K. M. Ervin and W. C. Lineberger, *J. Chem. Phys.*, 1990, **93**, 6987.
9. V. Beutel, G. L. Bhale, M. Kuhn and W. Demtröder, *Chem. Phys. Lett.*, 1992, **185**, 313.
10. G. Ganteför, M. Gausa, K.-H. Meiwes-Broer and H. O. Lutz, *J. Chem. Soc., Faraday Trans.*, 1990, **86**, 2483.

11. CRC Handbook of Chemistry and Physics, ed. D. R. Lide, CRC Press, Boca Raton, FL, 90th edn., 2010, p10-210.

12. D. H. Andrews, A. J. Gianola and W. C. Lineberger, *J. Chem. Phys.*, 2002, **117**, 4074.

## S2. Figs. S1 and S2

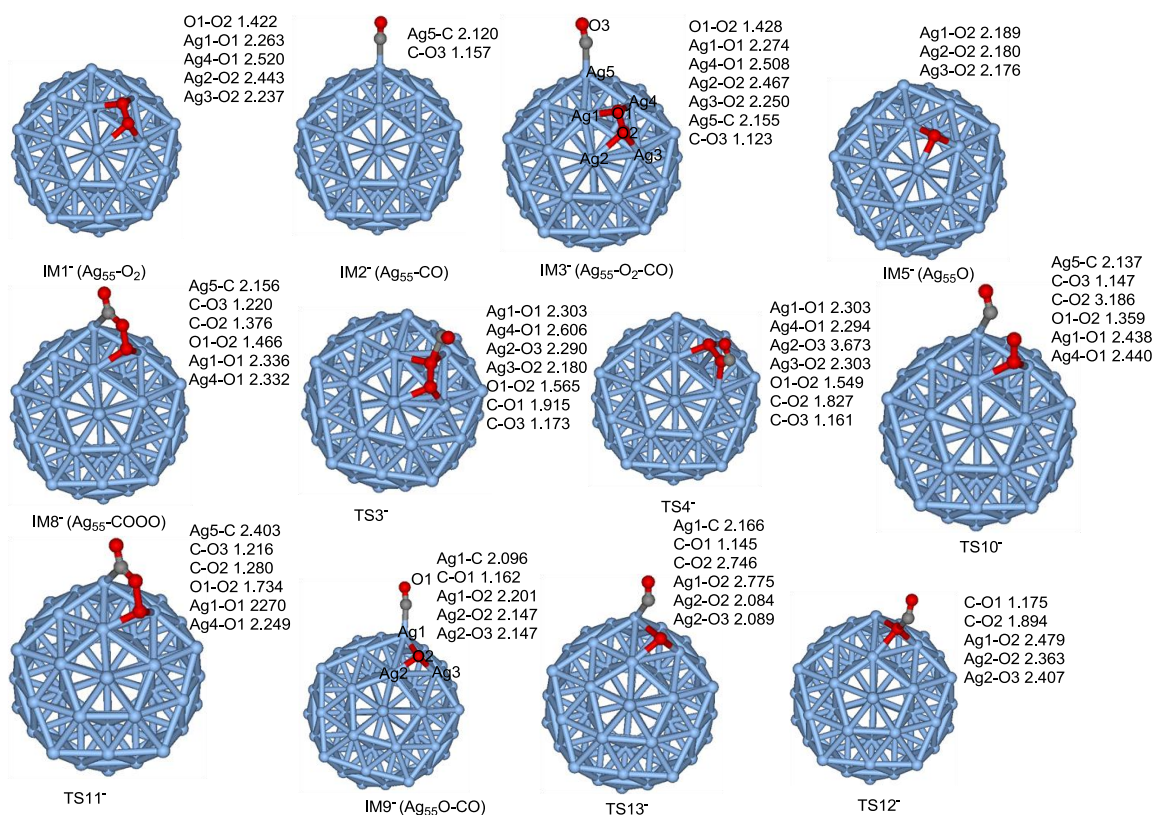

**Fig. S1.** Optimized structures and the related parameters of the  $\text{Ag}_{55}$ -catalyzed CO oxidation.

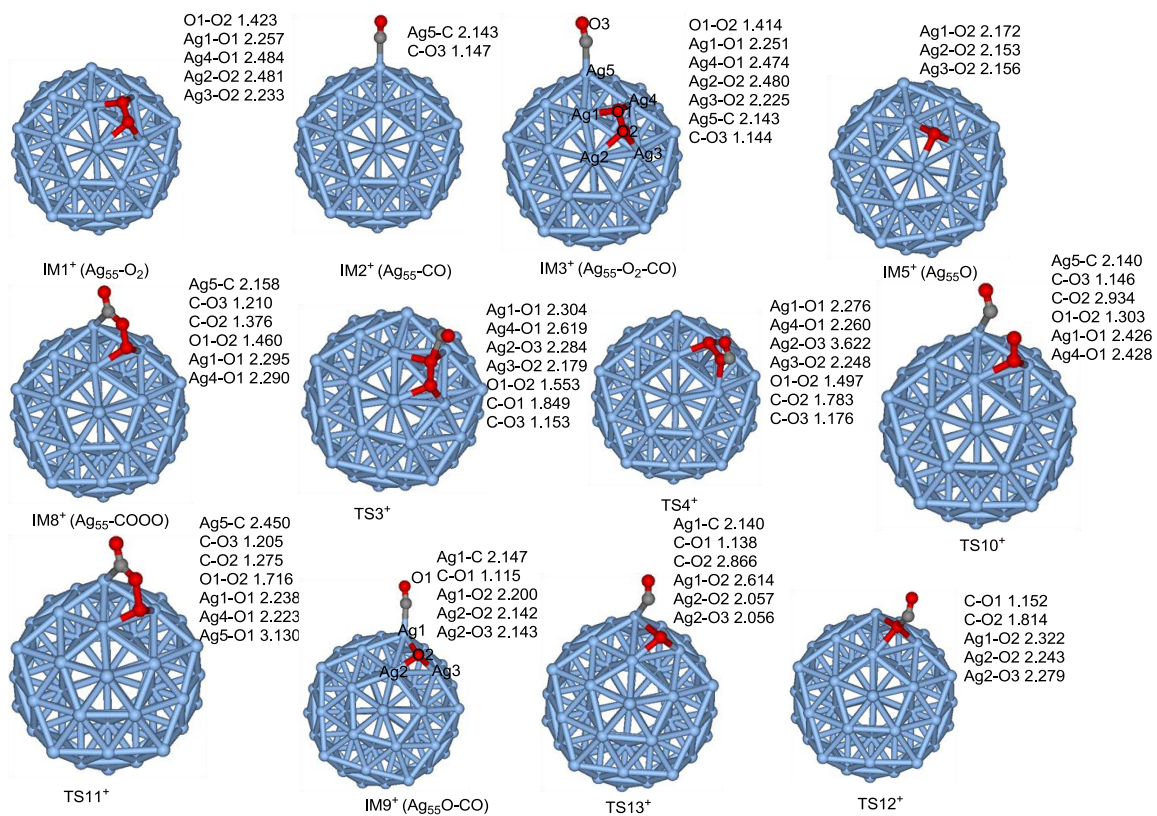

**Fig. S2.** Optimized structures and the related parameters of the  $\text{Ag}_{55}^+$ -catalyzed CO oxidation.
